# Supplementary material for: Impact of PD-1+Tim-3+CD8+ T cells in pretreatment tumors on chemotherapy responses in esophageal cancer
Source: Research Square preprint supplement (doi:10.21203/rs.3.rs-7398628/v1), 2025-09-03
Supplement: Supplementary file 1 [file 3b09fc174496d34aa222663e.docx]

**Table. 1** Clinicopathological features of patients based on NAC responses.

|  | All  (n=60) | NAC non-responder  (n=31) | NAC responder  (n=29) | *p* value |
| --- | --- | --- | --- | --- |
| Age (years) | 70 (65-73) | 69 (64-74) | 70 (66-73) | 0.91 |
| Sex | 47 / 13 | 23 / 8 | 24 / 5 | 0.42 |
| BMI (kg/m2) | 21 (18.9-23.5) | 21 (19.1-23.2) | 21 (18.2-24.1) | 0.89 |
| Alb (g/dl) | 4.1 (3.6-4.3) | 4 (3.5-4.2) | 4.1 (3.7-4.3) | 0.67 |
| CRP (mg/dl) | 0.18 (0.1-1.0) | 0.27 (0.04-1.1) | 0.17 (0.06-0.54) | 0.60 |
| mGPS  0  1  2 | 39  13  8 | 17  8  6 | 22  5  2 | 0.19 |
| NLR | 2.5 (1.9-4.0) | 2.4 (1.8-3.0) | 3.2 (1.8-4.6) | 0.34 |
| Location  Upper  Middle  Lower | 11  25  24 | 3  13  15 | 8  12  9 | 0.15 |
| cT  1/2  3/4 | 11  49 | 7  24 | 4  25 | 0.38 |
| cN  0/1  2/3 | 49  11 | 25  6 | 24  5 | 0.83 |
| cM  0  1 | 49  11 | 26  5 | 23  6 | 0.65 |
| cStage  I / II  III / IV | 18  42 | 11  20 | 7  22 | 0.34 |

Abbreviations: *BMI*, body mass index; *Alb*, albumin; *CRP*, C-reactive protein; *mGPS*, modified Glasgow Prognostic Score; *NLR*, neutrophil-lymphocyte ratio; *Location*, tumor location in the esophagus.
