# Supplementary material for: Impact of PD-1+Tim-3+CD8+ T cells in pretreatment tumors on chemotherapy responses in esophageal cancer
Source: Research Square preprint supplement (doi:10.21203/rs.3.rs-7398628/v1), 2025-09-03
Supplement: Supplementary file 2 [file 751c61a3611829a0d253c223.docx]

**Table. 2** Univariate and multivariate analyses of a poor NAC response in 60 EC patients.

|  | Univariate analysis | | |  | Multivariate analysis | | |
| --- | --- | --- | --- | --- | --- | --- | --- |
| OR | 95% CI | *p* value |  | OR | 95% CI | *p* value |
| Age (≥65 years) | 0.46 | 0.12-1.7 | 0.25 |  | 0.35 | 0.071-1.7 | 0.19 |
| Sex (male) | 0.60 | 0.17-2.1 | 0.42 |  |  |  |  |
| cT (3, 4) | 0.55 | 0.14-2.1 | 0.55 |  |  |  |  |
| cN (2, 3) | 1.2 | 0.31-4.3 | 0.83 |  |  |  |  |
| cM (1) | 0.74 | 0.20-2.7 | 0.65 |  |  |  |  |
| mGPS (1, 2) | 2.6 | 0.86-7.8 | 0.092 |  | 4.6 | 1.1-18.9 | 0.034 |
| NLR (high)* | 0.88 | 0.32-2.4 | 0.80 |  |  |  |  |
| CD8/CD4 (high)** | 0.81 | 0.29-2.3 | 0.69 |  |  |  |  |
| PD-1+Tim3+CD8+ TILs (high)*** | 3.0 | 1.0-8.5 | 0.042 |  | 4.1 | 1.1-14.7 | 0.032 |

* Higher than the median value of 2.5

** Higher than the median value of 0.68

*** Higher than the cut-off value of 27.5

Abbreviations: *OR*, odds ratio; *CI*, confidence interval; *mGPS*, modified Glasgow Prognostic Score; *NLR*, neutrophil-lymphocyte ratio; *CD8/CD4*, ratio of CD8 to CD4 lymphocytes.
