# Supplementary material for: Impact of PD-1+Tim-3+CD8+ T cells in pretreatment tumors on chemotherapy responses in esophageal cancer
Source: Research Square preprint supplement (doi:10.21203/rs.3.rs-7398628/v1), 2025-09-03
Supplement: Supplementary file 3 [file 8552fb37021b0f52dd3e6dbe.docx]

**Table. S2** Clinicopathological features of patients with high or low PD-1+Tim-3+ expression on CD8+TILs.

|  | High  PD-1+Tim-3+CD8+TILs  (n=32) | Low  PD-1+Tim-3+CD8+TILs  (n=28) | *p* value |
| --- | --- | --- | --- |
| Age (years) | 68 (64-73) | 72 (68-75) | 0.20 |
| Sex | 25 / 7 | 22 / 6 | 0.97 |
| BMI (kg/m2) | 21.0 (19.2-23.4) | 21.0 (18.0-23.7 | 0.96 |
| Alb (g/dl) | 4.1 (3.6-4.2) | 4.1 (3.5-4.3) | 0.66 |
| CRP (mg/dl) | 0.22 (0.053-1.1) | 0.15 (0.05-0.57) | 0.53 |
| mGPS  0  1  2 | 20  9  3 | 19  4  5 | 0.33 |
| NLR | 2.4 (1.9-3.7) | 2.6 (1.7-4.3) | 0.99 |
| Location  Upper  Middle  Lower | 4  13  15 | 7  12  9 | 0.35 |
| cT  1/2  3/4 | 7  25 | 4  24 | 0.45 |
| cN  0/1  2/3 | 26  6 | 23  5 | 0.93 |
| cM  0  1 | 26  6 | 23  5 | 0.93 |
| cStage  I / II  III / IV | 10  22 | 8  20 | 0.82 |

Abbreviations: *BMI*, body mass index; *Alb*, albumin; *CRP*, C-reactive protein; *mGPS*, modified Glasgow Prognostic Score; *NLR*, neutrophil-lymphocyte ratio; *Location*, tumor location in the esophagus.
