# Supplementary material for: Impact of PD-1+Tim-3+CD8+ T cells in pretreatment tumors on chemotherapy responses in esophageal cancer
Source: Research Square preprint supplement (doi:10.21203/rs.3.rs-7398628/v1), 2025-09-03
Supplement: Supplementary file 4 [file 9cb3aa5ba6725967ee7ca9e8.docx]

**Table. S1** Relationship between NAC responses and the expression of surface molecules on CD4+ and CD8+ TILs from EC.

|  | Histopathological response | | *p* value |
| --- | --- | --- | --- |
| Non-responder (n=31) | Responder (n=29) |  |
| Lym / Mye | 0.96 (0.57-2.8) | 1.2 (0.38-2.4) | 0.84 |
| CD8 / CD4 | 0.65 (0.53-1.6) | 0.70 (0.41-0.93) | 0.25 |
| on CD8+TILs (%) |  |  |  |
| CD45RA+ | 10.4 (7.0-19.1) | 14.5 (6.8-35.1) | 0.41 |
| PD-1+ | 71.2 (60.5-91.8) | 69.4 (55.3-84.5) | 0.35 |
| Tim-3+ | 31.5 (17.2-60.7) | 23 (13.9-38.9) | 0.063 |
| ICOS+ | 12.8 (1.6-32.3) | 16.6 (4.7-36.1) | 0.35 |
| 4-1BB+ | 6.2 (3.0-12) | 8.9 (6-14) | 0.16 |
| OX-40+ | 4.9 (2.1-11.2) | 5.4 (0.8-8.7) | 0.69 |
| CD103+ | 51.3 (37.4-84.4) | 49.6 (34.1-74.4) | 0.72 |
| on CD4+TILs (%) |  |  |  |
| CD45RA+ | 3.2 (2.0-4.5) | 2.6 (0.6-7.0) | 0.97 |
| PD-1+ | 73.4 (64.6-86.3) | 69.4 (63.2-75.4) | 0.19 |
| Tim-3+ | 14.7 (10.7-21.4) | 15.3 (8.3-23.7) | 0.74 |
| ICOS+ | 54.6 (34.6-70.1) | 58.4 (42.1-72.7) | 0.68 |
| 4-1BB+ | 9.7 (4.8-14) | 11.1 (9-22.6) | 0.15 |
| OX-40+ | 32.4 (12.3-43.3) | 28.1 (13.9-54.9) | 0.58 |
| CD25++ | 23.4 (14.5-31.7) | 23.8 (17.4-31) | 0.75 |
| ICOS+CD25++ | 26.7 (12.9-38.9) | 26.3 (19.1-33) | 0.97 |
| CD103+ | 9.2 (5.2-16.4) | 9.5 (6.1-13.4) | 0.82 |

Abbreviations: *Lym*, lymphocyte; *Mye*, myelocyte.
